# Supplementary material for: Gold Nanoparticles Induced Size Dependent Cytotoxicity on Human Alveolar Adenocarcinoma Cells by Inhibiting the Ubiquitin Proteasome System
Source: Pharmaceutics. 2023 Jan 28;15(2):432. doi: 10.3390/pharmaceutics15020432 (PMC9961554; doi:10.3390/pharmaceutics15020432)
Supplement: Supplementary file 1 [file pharmaceutics-15-00432-s001.zip › pharmaceutics-2128033-supplementary.pdf]

# Gold nanoparticles induced size dependent cytotoxicity on human alveolar adenocarcinoma cells by inhibiting the ubiquitin proteasome system

Bashiru Ibrahim<sup>1,2</sup>, Taiwo Hassan Akere<sup>1,2</sup>, Swaroop Chakraborty<sup>2</sup>, Eugenia Valsami-Jones<sup>2\*</sup> and Hanene Ali-Boucetta<sup>2\*</sup>

<sup>1</sup>Nanomedicine, Drug Delivery & Nanotoxicology (NDDN) Lab, School of Pharmacy, College of Medical & Dental Sciences, University of Birmingham, Birmingham, B15 2TT United Kingdom

<sup>2</sup>FENAC Lab, School of Geography, Earth and Environmental Sciences, College of Life and Environmental Sciences, University of Birmingham, Birmingham B15 2TT, United Kingdom

Corresponding author e-mail: : [h.aliboucetta@bham.ac.uk](mailto:h.aliboucetta@bham.ac.uk) ; [e.valsamijones@bham.ac.uk](mailto:e.valsamijones@bham.ac.uk)

## Supplementary Information

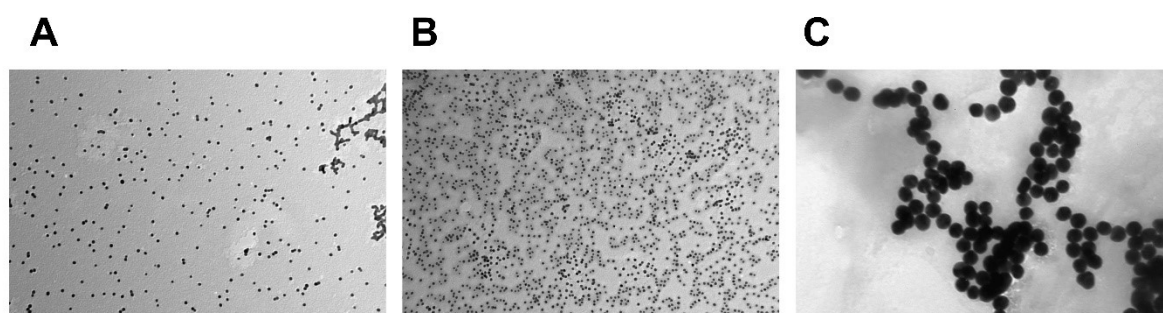

**Figure S1.** Characterisation of different sizes AuNPs dispersed in Ultrapure water by Transmission of electron microscopy (TEM): (A) 5 nm AuNPs (B) 10 nm AuNPs (C) 80 nm AuNPs

### Surface area (SA)

The surface area of different size AuNPs corresponding to the concentrations used in the cell viability assay was calculated according to Teeguarden *et al.*, (2007) using the below equation. Where AuNPs are assumed to be spherical or nanosphere,  $r$  is the radius of AuNPs suspended in medium determined by DLS and  $V$  is the volume of a sphere used [68].

$$V = \frac{4}{3}(\pi r^3)$$

For instance, the surface area of 5 nm AuNPs (17.57 nm diameter measured with DLS) at a starting concentration was as follows.

|                                    |               |           |
|------------------------------------|---------------|-----------|
| Mass concentration (gm)            | concentration | 0.005     |
| Diameter (nm)                      | $r^2$         | 308.7049  |
| Radius (r)                         | Diameter/2    | 154.35245 |
| Density of Au (g/cm <sup>3</sup> ) | 19.32         | 19.32     |

|                                    |                        |             |
|------------------------------------|------------------------|-------------|
| Volume (V)                         | mass/density           | 0.000258799 |
| Volume per particle (v)            | $4/3(\pi r^3)$         | 15011136.78 |
| N                                  | V/v                    | 1.72405E-11 |
| SA per particles (M <sup>2</sup> ) | $4\pi r^2$             | 299237.966  |
| Total SA M <sup>2</sup> /g         | N*sa (m <sup>2</sup> ) | 5.15901E-06 |

**Table S1:** Surface area (m<sup>2</sup>/g) of different 5, 10 and 80 nm AuNPs at different mass concentrations used in the cell viability assays.

| AuNPs | Mass concentration (μg/mL) |          |          |          |          |          |          |          |
|-------|----------------------------|----------|----------|----------|----------|----------|----------|----------|
|       | 5                          | 10       | 15       | 20       | 25       | 30       | 35       | 40       |
| 5 nm  | 5.13E-06                   | 1.03E-05 | 1.55E-05 | 2.06E-05 | 2.58E-05 | 3.1E-05  | 3.61E-05 | 4.13E-05 |
| 10 nm | 1.36E-06                   | 2.73E-06 | 4.09E-06 | 5.46E-06 | 6.82E-06 | 8.18E-06 | 9.55E-06 | 1.09E-05 |
| 80 nm | 1.27E-07                   | 2.54E-07 | 3.81E-07 | 5.08E-07 | 6.35E-07 | 7.62E-07 | 8.89E-07 | 1.02E-06 |

#### Particle number concentration

The particles number concentration of AuNPs was calculated according to the formula described by Huk *et al.*, [69]. The mass (Au) concentration(mg/mL) and the particle concentration (NPs/ml) of different size AuNPs were provided in the certificate of analysis of NPs by manufacturer (<https://tools.nanocomposix.com:48/cdn/coa/Gold/Spheres/NanoXact/AU5-NX-CIT-JRC0024.pdf?121%20956>). Using the highest concentration of AuNPs used for our study (40 μg/mL), we calculated the particle number concentration using the formula below:

$$\text{PNC} = \text{NPs mass concentration} * \text{NPs/mL/Mass Au}$$

**Table S2:** The table show the number of particles per volume (NPs/ML) for the highest concentration used in the cell viability assay and the number of viable cells remained after exposed to different size AuNPs for 24 h.

| AuNPs | 40 μg/mL |             |
|-------|----------|-------------|
|       | NPs/mL   | % Viability |
| 5 nm  | 3.17E+13 | 9.240198    |
| 10 nm | 2.50E+12 | 12.9125     |
| 80 nm | 8.46E+09 | 29.08156    |

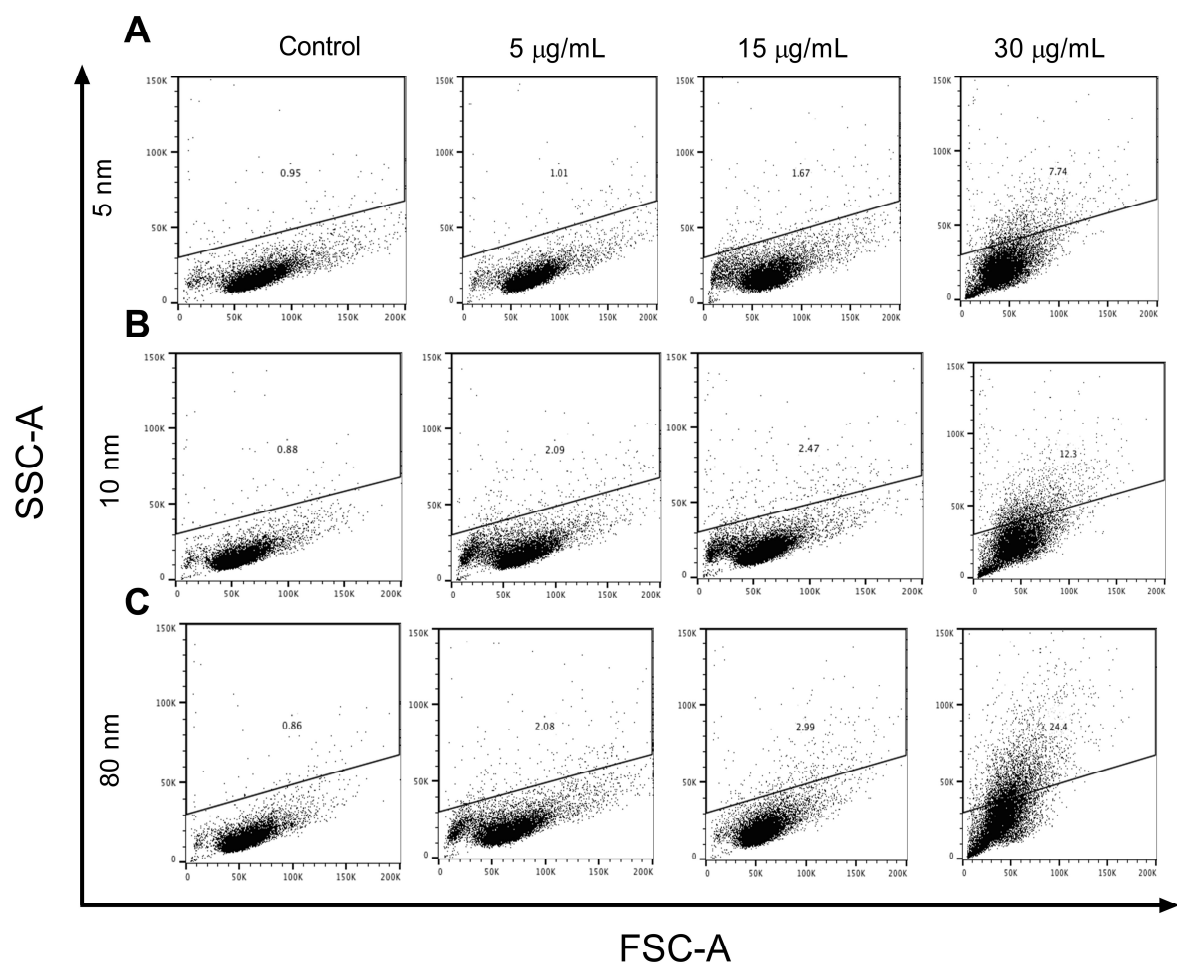

**Figure S2.** Dot plots of side scattered intensity (SSC) versus forward scattered intensity (FSC) of A549 cells treated with different concentration of AuNPs for 24 h. (A) 5 nm (B) 10 nm (C) 80 nm

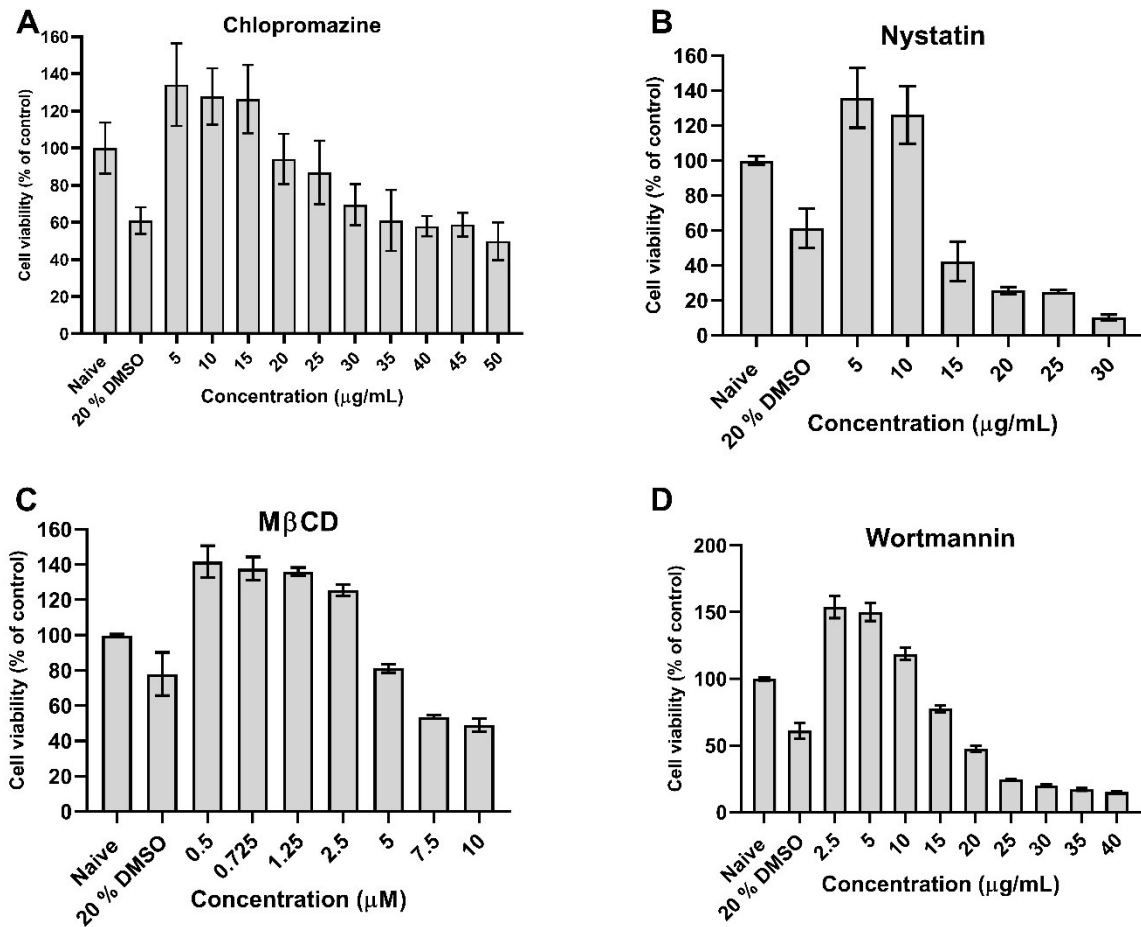

**Figure S3:** Percentage cell viability of A549 cells determined using MTT assay for pre-treated with pharmacological inhibitors (A) Chlorpromazine hydrochloride, inhibitor of Clathrin mediated endocytosis (B) Nystatin, inhibitor of Caveolae mediated endocytosis (C) M $\beta$ CD, inhibitor of Caveolae mediated endocytosis (D) Wortmannin, inhibitor of macropinocytosis for different concentration after 1 h exposure. 20% DMSO was used as a positive control.

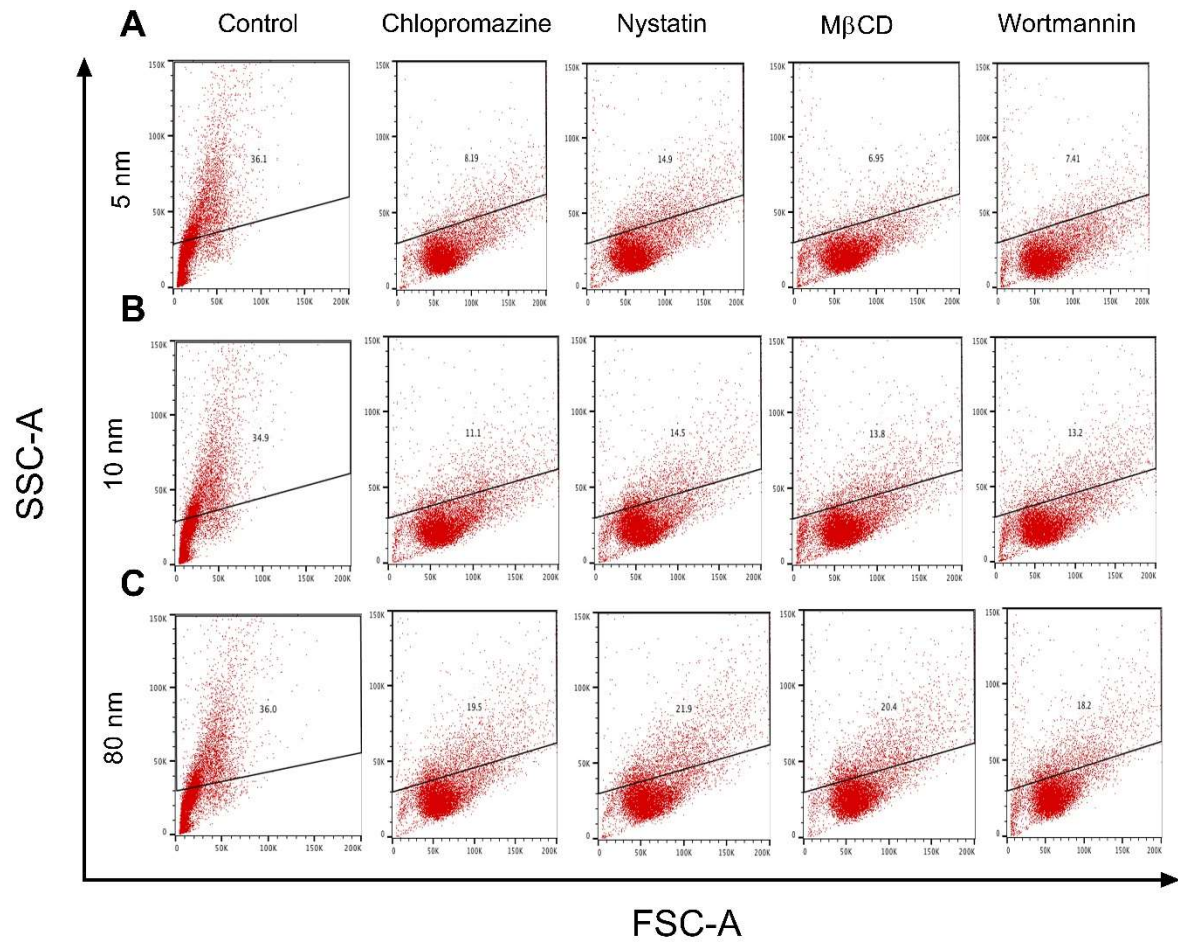

**Figure S4:** Dot plots effects of pharmacological inhibitors on the internalisation of different size AuNPs in A549 cells. Cells were separately pre-incubated with Chlorpromazine, Nystatin, methyl- $\beta$ -cyclodextrin (M $\beta$ CD) and Wortmannin for 1 h, followed by adding AuNPs incubation for 3 h and analysed flow cytometry. (A) 5 nm (B) 10 nm (C) 80 nm

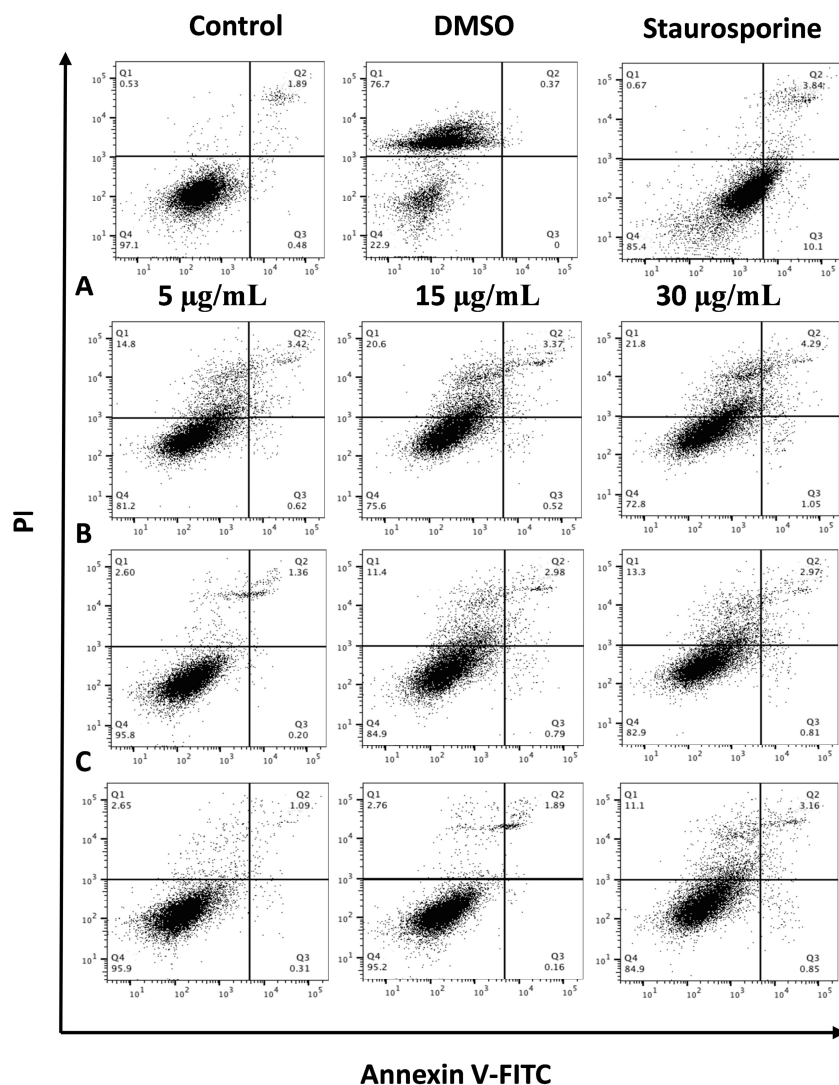

**Figure S5.** Apoptosis and necrosis analysis of A549 cells following the exposure to AuNPs of different sizes flow cytometry at 5-30  $\mu\text{g/mL}$  for 24 h. (A) 5 nm (B) 10 nm (C) 80 nm. 1  $\mu\text{M}$  Staurosporine and 10 % DMSO was used as positive control for apoptosis and necrosis for 6 h.
